# Supplementary material for: Modulation of anxiety and fear via distinct intrahippocampal circuits
Source: eLife journal article supplement (doi:10.7554/elife.14120), 2016-03-13
Supplement: fig2-data1 [file Figure 2-source data_1.xlsx]

## Sheet: EPM
Genotype	Diazepam dose (mg/kg)	% Open arm Time	%Open arm entries	Total distance travelled
α2F/F	0	34.301	37.5	1282.39
α2F/F	0	14.5924	39.5349	1240.45
α2F/F	0	21.5326	40.9091	1261.22
α2F/F	0	18.5964	39.0244	1440.22
α2F/F	0	29.0958	68.1818	1181.19
α2F/F	0	7.8301	52.7778	1310.3
α2F/F	0	3.181	45.7143	1314.06
α2F/F	0	10.4549	45.1613	1313.45
α2F/F	0	11.7896	38.8889	1242.03
α2F/F	0	7.4074	54	1377.6
	Mean	15.8781	46.1692	1296.29
	S.E.M.	3.16051	3.05807	23.3019
α2CA1KO	0	36.0805	66.6667	1381.78
α2CA1KO	0	5.5834	33.3333	1501.2
α2CA1KO	0	32.121	60	1297.05
α2CA1KO	0	11.7006	44.4444	1390.78
α2CA1KO	0	37.9491	51.2821	1360.58
α2CA1KO	0	18.8856	41.3793	1113.3
α2CA1KO	0	18.5052	18.1818	1004.96
α2CA1KO	0	36.9481	42.8571	1367.71
α2CA1KO	0	14.2587	43.1818	1312.72
α2CA1KO	0	14.8371	57.7778	1553.98
α2CA1KO	0	13.6359	54.2857	1292.32
α2CA1KO	0	20.5984	53.4884	1523.48
α2CA1KO	0	14.2365	66.6667	1462.14
	Mean	21.18	48.7342	1350.92
	S.E.M.	3.00715	3.7726	43.3255
α2CA3KO	0	31.2757	33.3333	1378.46
α2CA3KO	0	32.1877	63.8298	1728.96
α2CA3KO	0	34.4122	53.3333	1230.71
α2CA3KO	0	26.5699	51.2195	1469.54
α2CA3KO	0	13.6581	62.069	1076.53
α2CA3KO	0	8.8755	53.3333	860.128
α2CA3KO	0	17.8623	46.6667	1595.02
α2CA3KO	0	16.7111	39.3939	1330.31
α2CA3KO	0	28.8222	49.6531	1158.9
α2CA3KO	0	23.6667	66.6667	1514.23
	Mean	23.4041	51.9499	1334.28
	S.E.M.	2.75139	3.33649	82.2695
α2DGKO	0	24.2465	83.3333	1049.49
α2DGKO	0	7.2517	71.4286	1060.73
α2DGKO	0	3.7593	45.9459	1276.51
α2DGKO	0	51.1723	50	1917.41
α2DGKO	0	18.2467	48.497	1452.97
α2DGKO	0	24.4967	38.4477	1648.67
α2DGKO	0	8.1764	41.1544	947.565
α2DGKO	0	26.933	59.5238	901.97
α2DGKO	0	19.4194	57.5758	1540.3
α2DGKO	0	12.101	48.2759	1638.9
	Mean	19.5803	54.4182	1343.45
	S.E.M.	4.33096	4.41783	109.701
α2F/F	2	41.6194	77.7778	1643.71
α2F/F	2	21.4659	54.5455	1413.9
α2F/F	2	31.5871	36.1111	1051.67
α2F/F	2	46.3352	75.6757	1603.69
α2F/F	2	32.5437	50.9524	1368.67
α2F/F	2	15.0373	54.5455	1172.61
α2F/F	2	46.4909	51.3514	1313
α2F/F	2	17.1282	60.6061	761.761
α2F/F	2	20.6874	55.5556	1586.7
	Mean	30.3217	57.4579	1323.97
	S.E.M.	4.13484	4.26643	96.6704
α2CA1KO	2	40.7519	63.6364	1252.27
α2CA1KO	2	38.6831	61.9048	1107.8
α2CA1KO	2	23.6904	67.4419	1458.3
α2CA1KO	2	30.297	51.1628	1411.84
α2CA1KO	2	33.1443	58.9744	1311.43
α2CA1KO	2	39.9288	64.8276	1325.12
α2CA1KO	2	32.4102	53.8462	1184.29
α2CA1KO	2	29.8521	52.2727	1261.53
α2CA1KO	2	41.5749	48.6486	1491.58
α2CA1KO	2	39.7509	57.1429	1348.12
α2CA1KO	2	33.5669	58.0125	1315.29
	Mean	34.8773	57.9883	1315.23
	S.E.M.	1.71969	1.83084	34.2604
α2CA3KO	2	30.9865	65.9574	1567.84
α2CA3KO	2	15.104	40.4255	1187.32
α2CA3KO	2	48.5819	64.2857	1394.46
α2CA3KO	2	32.9885	37.931	1427.59
α2CA3KO	2	22.4892	32.5581	1277.29
α2CA3KO	2	25.411	51.4286	1268.95
α2CA3KO	2	16.9503	62.7907	1495.42
α2CA3KO	2	23.2	40.1538	1653.15
α2CA3KO	2	23.8889	61.7021	1342.49
α2CA3KO	2	30.3333	50.9091	1132.45
	Mean	26.9934	50.8142	1374.7
	S.E.M.	3.01505	3.93559	52.5043
α2DGKO	2	31.5871	91.4894	1164.83
α2DGKO	2	22.7338	57.5758	1068.52
α2DGKO	2	37.4973	36.4643	1216.25
α2DGKO	2	16.4679	29.4494	1005.55
α2DGKO	2	10.4676	40.4478	1379.36
α2DGKO	2	14.6867	49.4933	1067.87
α2DGKO	2	39.4976	62.7674	957.536
α2DGKO	2	27.0222	40.5405	1303.55
α2DGKO	2	29.7186	76.4595	1160.55
α2DGKO	2	17.4922	38.4615	1342.46
	Mean	24.7171	52.3149	1166.65
	S.E.M.	3.13964	6.24317	45.5176

## Sheet: LDB
Genotype	Diazepam dose (mg/kg)	% Time in light	Number of entries to light
α2F/F	0	11.6667	8
α2F/F	0	52	15
α2F/F	0	29.3333	6
α2F/F	0	42.6667	8
α2F/F	0	18	9
α2F/F	0	13	4
α2F/F	0	23	7
α2F/F	0	12.3333	8
α2F/F	0	7	3
α2F/F	0	0.8453	2
α2F/F	0	22.6667	6
	Mean	21.1375	6.90909
	S.E.M.	4.61607	1.05705
α2CA1KO	0	66.6667	7
α2CA1KO	0	1.3333	13
α2CA1KO	0	3.3333	12
α2CA1KO	0	8	4
α2CA1KO	0	16.5944	1
α2CA1KO	0	34.2787	10
α2CA1KO	0	21.7551	1
α2CA1KO	0	31.1867	9
α2CA1KO	0	42.0865	1
	Mean	25.0261	6.44444
	S.E.M.	7.02394	1.61685
α2CA3KO	0	54.3333	14
α2CA3KO	0	6.6667	8
α2CA3KO	0	53	6
α2CA3KO	0	47.3333	9
α2CA3KO	0	54.6667	15
α2CA3KO	0	34.6667	11
α2CA3KO	0	51	11
α2CA3KO	0	43.3333	12
α2CA3KO	0	43	4
α2CA3KO	0	49	11
	Mean	43.7	10.1
	S.E.M.	4.55594	1.07961
α2DGKO	0	7.6667	20
α2DGKO	0	26	1
α2DGKO	0	26	22
α2DGKO	0	30.6667	15
α2DGKO	0	32	23
α2DGKO	0	0.6667	20
α2DGKO	0	8.6667	6
α2DGKO	0	32.6667	5
α2DGKO	0	38.6667	11
α2DGKO	0	27.3333	12
	Mean	23.0333	13.5
	S.E.M.	4.02045	2.45515
α2F/F	2	41	18
α2F/F	2	48	27
α2F/F	2	80	7
α2F/F	2	74	22
α2F/F	2	71.3333	2
α2F/F	2	55	7
α2F/F	2	27	5
α2F/F	2	74.6667	5
α2F/F	2	6.6667	10
α2F/F	2	59.148	31
α2F/F	2	78.3895	6
	Mean	55.9277	12.7273
	S.E.M.	7.1092	3.02141
α2CA1KO	2	68	7
α2CA1KO	2	59	12
α2CA1KO	2	29	8
α2CA1KO	2	44.3333	5
α2CA1KO	2	70	32
α2CA1KO	2	63.7971	6
α2CA1KO	2	61.7284	4
α2CA1KO	2	71.2045	19
α2CA1KO	2	64.0418	5
α2CA1KO	2	77.2105	19
	Mean	60.8316	11.7
	S.E.M.	4.49693	2.85988
α2CA3KO	2	40.3333	12
α2CA3KO	2	19	20
α2CA3KO	2	20.3333	9
α2CA3KO	2	16	5
α2CA3KO	2	78.6667	1
α2CA3KO	2	75.6667	6
α2CA3KO	2	66.3333	5
α2CA3KO	2	66	6
α2CA3KO	2	53	12
α2CA3KO	2	34.6667	13
	Mean	47	8.9
	S.E.M.	7.63617	1.72852
α2DGKO	2	3.6667	12
α2DGKO	2	3	20
α2DGKO	2	42.3333	1
α2DGKO	2	34.3333	13
α2DGKO	2	38	10
α2DGKO	2	57.3333	8
α2DGKO	2	24	11
α2DGKO	2	31.6667	18
α2DGKO	2	30.6667	3
α2DGKO	2	22	12
	Mean	28.7	10.8
	S.E.M.	5.26072	1.85472
