# Supplementary material for: Modulation of anxiety and fear via distinct intrahippocampal circuits
Source: eLife journal article supplement (doi:10.7554/elife.14120), 2016-03-13
Supplement: fig3-data1 [file Figure 3-source data_1.xlsx]

## Sheet: FPS
Genotype	Diazepam dose (mg/kg)	No Tone Startle Amp. (a.u.)	Tone Startle Amp. (a.u.)	%FPS
α2F/F	0	5.7004	7.4068	29.9347
α2F/F	0	4.367	9.7955	124.307
α2F/F	0	6.3409	11.1142	75.278
α2F/F	0	6.9776	14.0928	101.972
α2F/F	0	4.8055	6.1616	28.2197
α2F/F	0	2.3253	6.9271	197.901
α2F/F	0	3.367	5.6983	69.2397
α2F/F	0	4.635	5.4122	16.7681
α2F/F	0	3.7032	5.3024	43.1843
α2F/F	0	5.3265	8.0607	51.332
α2F/F	0	6.7472	11.2734	67.0826
α2F/F	0	5.5016	10.7945	96.2066
α2F/F	0	1.4201	4.1574	192.754
α2F/F	0	3.8988	3.0987	-20.5217
α2F/F	0	6.3337	10.3164	62.8811
α2F/F	0	3.0049	6.1182	103.607
	Mean	4.65342	7.85814	77.5092
	S.E.M.	0.405946	0.764035	14.6979
α2F/F	2	4.7726	6.3197	32.4163
α2F/F	2	5.874	5.6194	-4.33435
α2F/F	2	7.5157	6.8701	-8.59002
α2F/F	2	4.617	9.7801	111.828
α2F/F	2	5.96	8.8701	48.8272
α2F/F	2	7.0607	5.6093	-20.556
α2F/F	2	7.4065	6.1592	-16.8406
α2F/F	2	4.844	6.5285	34.775
α2F/F	2	4.5525	5.2493	15.3059
α2F/F	2	2.765	2.0457	-26.0145
α2F/F	2	4.3549	5.6863	30.5725
α2F/F	2	3.0529	5.5835	82.8917
α2F/F	2	5.7354	7.4938	30.6587
α2F/F	2	7.1649	7.1537	-0.156318
	Mean	5.40544	6.35491	22.1988
	S.E.M.	0.410065	0.481864	10.6663
α2CA1KO	0	6.0292	9.3287	54.7253
α2CA1KO	0	3.7883	6.5926	74.0253
α2CA1KO	0	4.3114	5.0603	17.3702
α2CA1KO	0	5.3742	8.3843	56.0102
α2CA1KO	0	7.2603	11.3472	56.2911
α2CA1KO	0	6.3148	7.0729	12.0051
α2CA1KO	0	6.5772	9.9759	51.674
α2CA1KO	0	5.0674	7.8338	54.5921
α2CA1KO	0	5.1623	8.5456	65.5386
α2CA1KO	0	5.2452	6.3829	21.6903
	Mean	5.51303	8.05242	46.3922
	S.E.M.	0.332096	0.590819	6.76607
α2CA1KO	2	4.951	6.7706	36.7522
α2CA1KO	2	4.6523	7.1411	53.4961
α2CA1KO	2	7.9961	13.0131	62.7431
α2CA1KO	2	4.2691	7.7056	80.4971
α2CA1KO	2	4.1151	10.6965	159.933
α2CA1KO	2	8.198	9.2523	12.8605
α2CA1KO	2	3.1824	5.1064	60.4575
α2CA1KO	2	4.3928	8.0955	84.2902
α2CA1KO	2	6.8214	8.4229	23.4776
α2CA1KO	2	6.8885	8.3372	21.0307
α2CA1KO	2	6.7972	7.3984	8.84482
α2CA1KO	2	10.6576	10.2832	-3.51299
	Mean	6.07679	8.51857	50.0725
	S.E.M.	0.630808	0.598792	12.948
α2CA3KO	0	3.3456	11.5122	244.1
α2CA3KO	0	5.3024	5.2534	-0.92411
α2CA3KO	0	3.8255	8.1075	111.933
α2CA3KO	0	2.5159	4.1994	66.9144
α2CA3KO	0	4.0098	7.0813	76.5998
α2CA3KO	0	4.0317	2.681	-33.502
α2CA3KO	0	4.5125	10.158	125.108
α2CA3KO	0	3.9246	6.4275	63.7747
α2CA3KO	0	3.9347	6.4276	63.3568
α2CA3KO	0	3.9442	6.4275	62.9608
	Mean	3.93469	6.82754	78.0321
	S.E.M.	0.225872	0.82865	23.6618
α2CA3KO	2	4.8411	5.8206	20.233
α2CA3KO	2	8.1193	9.1472	12.66
α2CA3KO	2	3.615	3.3281	-7.93638
α2CA3KO	2	3.6694	4.4742	21.9327
α2CA3KO	2	4.9576	6.5403	31.9247
α2CA3KO	2	3.6954	4.2874	16.0199
α2CA3KO	2	4.8158	5.7664	19.7392
α2CA3KO	2	4.8163	5.7652	19.7018
α2CA3KO	2	5.4034	5.7671	6.73095
α2CA3KO	2	4.2292	5.7663	36.3449
	Mean	4.81625	5.66628	17.7351
	S.E.M.	0.416796	0.491415	3.92744
α2DGKO	0	6.1951	11.1588	80.123
α2DGKO	0	5.4474	7.6749	40.8911
α2DGKO	0	4.556	7.3281	60.845
α2DGKO	0	5.7791	8.3035	43.6815
α2DGKO	0	5.3809	11.402	111.898
α2DGKO	0	4.0317	6.6172	64.1293
α2DGKO	0	7.1975	10.7219	48.967
α2DGKO	0	6.0298	7.6371	26.6559
α2DGKO	0	4.3125	7.941	84.1391
α2DGKO	0	6.0008	8.3026	38.3582
α2DGKO	0	4.9912	8.3058	66.4089
	Mean	5.44745	8.67208	60.5542
	S.E.M.	0.280854	0.494271	7.42834
α2DGKO	2	11.1962	8.6498	-22.7434
α2DGKO	2	6.4586	7.4671	15.6148
α2DGKO	2	5.3375	9.1679	71.7639
α2DGKO	2	5.1504	9.4627	83.7275
α2DGKO	2	4.5125	6.1972	37.3341
α2DGKO	2	6.8786	7.1679	4.2058
α2DGKO	2	6.1124	8.0349	31.4525
α2DGKO	2	7.9537	8.1946	3.02878
α2DGKO	2	6.9254	7.6497	10.4586
α2DGKO	2	7.1673	7.6974	7.39609
α2DGKO	2	7.9726	7.9912	0.233299
	Mean	6.87865	7.97095	22.0429
	S.E.M.	0.546089	0.276279	9.60622

## Sheet: VCT
Genotype	Diazepam dose (mg/kg)	Habituation (unpinished) Licks*	Test (punished) licks			*Drug was administered only in the test session.
α2F/F	0	249	100
α2F/F	0	393	100
α2F/F	0	412	120
α2F/F	0	552	200
α2F/F	0	170	208
α2F/F	0	358	80
α2F/F	0	208	80
α2F/F	0	486	240
α2F/F	0	656	156
α2F/F	0	525	140
	Mean		142.4
	S.E.M.		18.0192
α2F/F	2	350	240
α2F/F	2	778	420
α2F/F	2	135	202
α2F/F	2	496	100
α2F/F	2	564	320
α2F/F	2	519	180
α2F/F	2	386	220
α2F/F	2	273	280
α2F/F	2	209	166
	Mean	406.263	236.444
	S.E.M.	39.8875	31.3595
α2CA1KO	0	276	120
α2CA1KO	0	484	140
α2CA1KO	0	614	120
α2CA1KO	0	439	180
α2CA1KO	0	618	140
α2CA1KO	0	277	180
α2CA1KO	0	803	200
α2CA1KO	0	359	100			FF Hab	406.263	39.8875	19
	Mean		147.5			132 Hab	462.312	41.6294	16
	S.E.M.		12.5			131 Hab	389.412	32.0881	17
α2CA1KO	2	446	60			134 Hab	418.467	41.2682	15
α2CA1KO	2	450	52
α2CA1KO	2	535	320
α2CA1KO	2	290	179
α2CA1KO	2	257	192
α2CA1KO	2	530	160
α2CA1KO	2	716	57
α2CA1KO	2	303	277
	Mean	462.312	162.125
	S.E.M.	41.6294	36.083
α2CA3KO	0	499	180
α2CA3KO	0	444	160
α2CA3KO	0	302	140
α2CA3KO	0	523	80
α2CA3KO	0	268	200
α2CA3KO	0	636	160
α2CA3KO	0	182	90
α2CA3KO	0	497	120
α2CA3KO	0	319	158
	Mean		143.111
	S.E.M.		13.3004
α2CA3KO	2	366	260
α2CA3KO	2	215	200
α2CA3KO	2	260	193
α2CA3KO	2	285	363
α2CA3KO	2	486	220
α2CA3KO	2	360	260
α2CA3KO	2	400	260
	2	578	319
	Mean	389.412	259.375
	S.E.M.	32.0881	20.6051
α2DGKO	0	466	80
α2DGKO	0	318	80
α2DGKO	0	617	220
α2DGKO	0	312	100
α2DGKO	0	359	160
α2DGKO	0	405	160
α2DGKO	0	366	200
	Mean		142.857
	S.E.M.		21.571
α2DGKO	2	747	380
α2DGKO	2	379	240
α2DGKO	2	314	160
α2DGKO	2	728	420
α2DGKO	2	271	160
α2DGKO	2	268	140
α2DGKO	2	467	280
α2DGKO	2	260	180
	Mean	418.467	245
	S.E.M.	41.2682	37.7492
