# Supplementary material for: Modulation of anxiety and fear via distinct intrahippocampal circuits
Source: eLife journal article supplement (doi:10.7554/elife.14120), 2016-03-13
Supplement: fig4-data1 [file Figure 4-source data_1.xlsx]

## Sheet: Peak Freq
α2F/F
	Stimulation intensity (mA)	Baseline Peak Frequency (Hz)					Mean	S.E.M.
	0.02	3.95	4.125	3.875	4.6	4.15	4.14	0.126145
	0.04	4.75	5	3.625	4.9	5.6	4.775	0.321714
	0.06	5.6	5.625	4.625	5.8	4.9	5.31	0.230299
	0.08	6.875	5.875	5.125	6.55	7.15	6.315	0.36577
	0.1	6.25	7.325	5.25	7.55	5.75	6.425	0.443988
		30 min Post-DZP Peak Frequency (Hz)					Mean	S.E.M.
	0.02	4.4833	4.0833	4.5667	3.9	4.2333	4.25332	0.12354
	0.04	4.5	4.3333	4.9167	4.4	3.9333	4.41666	0.157773
	0.06	4.8333	4.3333	3.6167	5.2	5.1667	4.63	0.297413
	0.08	4.9167	4.75	4.1667	5.3333	3.9333	4.62	0.254044
	0.1	4.1667	4.8333	4.3333	5.4333	5.3333	4.81998	0.255291
		60 min Post-DZP Peak Frequency (Hz)					Mean	S.E.M.
	0.02	4.4333	4	4.825	3.7	4.5333	4.29832	0.199726
	0.04	5.0417	4	4.4583	4.18	3.7	4.276	0.227673
	0.06	4.625	4.5333	3.5	4.84	4.7167	4.443	0.241148
	0.08	4.9167	4.4583	4.1667	4.78	4.4667	4.55768	0.132163
	0.1	4.7083	4.9583	4.2917	5.38	4.4833	4.76432	0.190022
α2CA1KO
	Stimulation intensity (mA)	Baseline Peak Frequency (Hz)					Mean	S.E.M.
	0.02	4.15	4.15	3.75	5		4.2625	0.263292
	0.04	6.275	4.6	4.975	6.45		5.575	0.462444
	0.06	7.025	5.75	5.75	6.95		6.36875	0.357563
	0.08	7.3	6.5	6.375	7.15		6.83125	0.230799
	0.1	7.525	6.9	6.975	7.3		7.175	0.145416
		30 min Post-DZP Peak Frequency (Hz)					Mean	S.E.M.
	0.02	3.7667	4.7333	3.8	5.36667		4.41667	0.387889
	0.04	4.6667	4.7	3.9667	5.8		4.78335	0.378709
	0.06	4.5	5.4	4.0333	5.06667		4.74999	0.302619
	0.08	5.3167	4.6333	4.4333	5.03333		4.85416	0.198316
	0.1	4.7833	4.9	4.4667	5.73333		4.97083	0.270145
		60 min Post-DZP Peak Frequency (Hz)					Mean	S.E.M.
	0.02	3.925	4.9833	3.7	3.9		4.12707	0.289815
	0.04	4.5667	4.55	3.9	4.9		4.47917	0.209208
	0.06	4.7333	4.7833	4.1833	5.7167		4.85415	0.318022
	0.08	5.3083	4.7333	4.45	5.6		5.0229	0.262453
	0.1	5.0417	4.8333	4.25	5.6		4.93125	0.278855
α2CA3KO
	Stimulation intensity (mA)	Baseline Peak Frequency (Hz)					Mean	S.E.M.
	0.02	3.75	4	5.125	4.75	4.125	4.35	0.254337
	0.04	5.375	4	4.375	6	4.875	4.925	0.354877
	0.06	5.75	5.25	5.125	6.375	5.375	5.575	0.225693
	0.08	6.625	6	6.375	6.5	6.25	6.35	0.107529
	0.1	7.25	5.625	7	6.875	7	6.75	0.287772
		30 min Post-DZP Peak Frequency (Hz)					Mean	S.E.M.
	0.02	4.4	5.91667	4	3.6667	4.3167	4.46001	0.386454
	0.04	4.83333	3.71667	4.5833	4.25	3.6667	4.21	0.23109
	0.06	5.16667	6.16667	6.25	5.1667	4	5.35001	0.410284
	0.08	5	5	5.6667	5.9167	4.75	5.26668	0.222681
	0.1	5.33333	6.33333	5.3333	5	5.4167	5.48333	0.224228
		60 min Post-DZP Peak Frequency (Hz)					Mean	S.E.M.
	0.02	4.5417	*	4.2917	4.2417	3.9333	4.2521	0.111707
	0.04	4.1667		4.625	4.4917	3.45	4.18335	0.234977
	0.06	4.5417		5.9167	4.45	4.2083	4.77918	0.344926
	0.08	4.875		5.25	5.1667	4.2917	4.89585	0.193944
	0.1	4.9167		4.9167	4.7917	4.75	4.84377	0.0384202
			*animal died after 30 mins
α2DGKO
	Stimulation intensity (mA)	Baseline Peak Frequency (Hz)					Mean	S.E.M.
	0.02	4.1	4.25	3.25	4.25	4.75	4.12	0.243721
	0.04	5.4	4.875	4.75	4.25	6.05	5.065	0.306757
	0.06	6.4	5	4.625	4.35	7.2	5.515	0.549409
	0.08	6.55	5.125	5.125	5.25	6.65	5.74	0.35219
	0.1	7.15	5	5.125	5.75	7.3	6.065	0.490892
		30 min Post-DZP Peak Frequency (Hz)					Mean	S.E.M.
	0.02	3.3333	4.5	3.6667	*	4.0333	3.88333	0.22394
	0.04	3.6667	5.4167	4.6167		5.5667	4.8167	0.390299
	0.06	3.9333	5.5833	4.6667		6.2333	5.10415	0.452166
	0.08	4.9	5.4167	4.5		5.6333	5.1125	0.228631
	0.1	5.4333	5.6667	4.5		5.4667	5.26668	0.233179
					*animal died after 20 mins
		60 min Post-DZP Peak Frequency (Hz)					Mean	S.E.M.
	0.02	3.3	5.4167	3.6667		4.4167	4.20003	0.418069
	0.04	3.65	5.5	4.6167		5.1167	4.72085	0.357896
	0.06	4.1	5.3333	4.6667		5.8167	4.97917	0.336397
	0.08	5.1333	5.1667	4.5		5.6	5.1	0.202576
	0.1	4.9667	5.375	4.4167		5.5	5.0646	0.21837

## Sheet: Slopes
α2F/F	Baseline Slope	30min Post-DZP Slope	%change from baseline	60min Post-DZP Slope	%change from baseline
	33.63	-1.08	-103.211	2.13	-93.6664
	36.38	9.58	-73.6668	11.88	-67.3447
	21.25	-6.08	-128.612	-6.79	-131.953
	37.75	20	-47.0199	19.8	-47.5497
	23.75	11	-53.6842	3.33	-85.9789
		Mean	-81.2388		-85.2985
		S.E.M.	15.3534		14.1323
α2CA1KO	Baseline Slope	30min Post-DZP Slope	%change from baseline	60min Post-DZP Slope	%change from baseline
	38.88	13.42	-65.4835	14.88	-61.7284
	37	1.33	-96.4054	-0.58	-101.568
	39.25	9	-77.0701	8.25	-78.9809
	24.5	-0.17	-100.694	20.5	-16.3265
		Mean	-84.9132		-64.6508
		S.E.M.	8.26704		16.1493
α2CA3KO	Baseline Slope	30min Post-DZP Slope	%change from baseline	60min Post-DZP Slope	%change from baseline
	41.25	10.16	-75.3697	2.13	-94.8364
	26.25	10.58	-59.6952	11.88	-54.7429
	28.75	18.75	-34.7826	-6.79	-123.617
	23.75	21.67	-8.75789	19.8	-16.6316
	35.63	16.41	-53.9433	3.33	-90.6539
		Mean	-46.5097		-76.0964
		S.E.M.	11.4559		18.4572
α2DGKO	Baseline Slope	30min Post-DZP Slope	%change from baseline	60min Post-DZP Slope	%change from baseline
	36.25	27.17	-25.0483	24.08	-33.5724
	8.75	11.67	33.3714	-2.08	-123.771
	20.63	7.75	-62.4333	6.92	-66.4566
	20
	28.5	14.67	-48.5263	13.25	-53.5088
		Mean	-25.6591		-69.3273
		S.E.M.	18.9037		17.3225
